# Supplementary material for: Unveiling the Association between HPV and Pan-Cancers: A Bidirectional Two-Sample Mendelian Randomization Study
Source: MDPI journal article supplement (doi:10.3390/cancers15215147), 2023-10-26
Supplement: s1 [file s1]

**Supplementary Table S1** | The detailed information of all statistical summary datasets used in this study

| Usage purpose                                              | Exposure/Outcome      | Trait                                                           | GWAS ID / EFO ID         | Year | Author        | Population           | Sample Size | n case | n control | n SNP      |
|------------------------------------------------------------|-----------------------|-----------------------------------------------------------------|--------------------------|------|---------------|----------------------|-------------|--------|-----------|------------|
| Univariate two-sample analysis & MR in Validation datasets | HPV 16 E7 Protein     | HPV E7 Type 16                                                  | prot-c-2623_54_4         | 2017 | Suhre K       | European             | 997         | NA     | NA        | 501,428    |
|                                                            | HPV 18 E7 Protein     | HPV E7 Type18                                                   | prot-c-2624_31_2         | 2017 | Suhre K       | European             | 997         | NA     | NA        | 501,428    |
|                                                            | Chronic HPV infection | chronic human papillomavirus infection                          | EFO_0010060              | 2019 | Mainali B     | Mix (Most white man) | 191         | 40     | 151       | 737,742    |
|                                                            | Bladder Cancer        | Bladder cancer                                                  | ieu-b-4874               | 2021 | Burrows       | European             | 373,295     | 1,279  | 372,016   | 9,904,926  |
|                                                            | Prostate Cancer       | Diagnoses - secondary ICD10: C61 Malignant neoplasm of prostate | ukb-b-18843              | 2018 | Ben Elsworth  | European             | 463,010     | 1,309  | 461,701   | 9,851,867  |
|                                                            | Anal Cancer           | Malignant neoplasm of anus and anal canal                       | finn-b-C3_ANUS_ANALCANAL | 2021 | NA            | European             | 218,792     | 108    | 218,684   | 16,380,466 |
|                                                            | Colorectal Cancer     | Colorectal cancer                                               | finn-b-C3_COLORECTAL     | 2021 | NA            | European             | 218,792     | 3,022  | 215,770   | 16,380,466 |
|                                                            | Vaginal Cancer        | Benign neoplasm: Vagina                                         | finn-b-CD2_BENIGN_VAGINA | 2021 | NA            | European             | 123,579     | 297    | 123,282   | 16,379,784 |
|                                                            | Vulvar Cancer         | Benign neoplasm: Vulva                                          | finn-b-CD2_BENIGN_VULVA  | 2021 | NA            | European             | 123,579     | 192    | 123,387   | 16,379,784 |
|                                                            | Breast Cancer         | Illnesses of siblings: Breast cancer                            | ukb-b-12227              | 2018 | Ben Elsworth  | European             | 361,809     | 16,586 | 345,223   | 9,851,867  |
| Univariate two-sample analysis                             | Ovarian Cancer        | Ovarian cancer                                                  | ieu-b-4963               | 2021 | Burrows       | European             | 199,741     | 1,218  | 198,523   | 9,822,229  |
|                                                            | Head and Neck Cancer  | Head and neck cancer                                            | ieu-b-4912               | 2021 | Burrows       | European             | 373,122     | 1,106  | 372,016   | 9,655,080  |
|                                                            | Oropharyngeal Cancer  | Oropharyngeal cancer                                            | ieu-b-4968               | 2021 | Burrows       | European             | 372,510     | 494    | 372,016   | 8,283,869  |
|                                                            | Lung Cancer           | Lung cancer                                                     | ieu-a-985                | NA   | NA            | European             | 40,453      | 23,848 | 16,605    | 7,877,791  |
|                                                            | Skin Cancer           | Other malignant neoplasms of skin (=non-melanoma skin cancer)   | finn-b-C3_OTHER_SKIN     | 2021 | NA            | European             | 218,410     | 10,382 | 208,410   | 16,380,466 |
|                                                            | Skin Cancer           | Cancer code, self-reported: skin cancer                         | ukb-b-12339              | 2018 | Ben Elsworth  | European             | 462,933     | 1,436  | 461,497   | 9,851,867  |
|                                                            | Bladder Cancer        | Diagnoses - main ICD10: C67 Malignant neoplasm of bladder       | ukb-d-C67                | 2018 | Neale lab     | European             | 361,194     | 1,554  | 359,640   | 10,267,743 |
|                                                            | Prostate Cancer       | Malignant neoplasm of prostate                                  | ukb-d-C3_PROSTATE        | 2018 | Neale lab     | European             | 361,194     | 6,321  | 354,873   | 12,453,833 |
|                                                            | Prostate Cancer       | Cancer code self-reported: prostate cancer                      | ukb-a-57                 | 2017 | Neale Lab     | European             | 337,159     | 2,495  | 334,664   | 10,894,596 |
|                                                            | Prostate Cancer       | Prostate cancer                                                 | ieu-b-4809               | 2021 | Burrows       | European             | 182,625     | 9,132  | 173,493   | NA         |
| Validation analysis                                        | Breast Cancer         | Breast cancer                                                   | ebi-a-GCST007236         | 2015 | Michailidou K | European             | 89,677      | 46,785 | 42,892    | 13,742,658 |
|                                                            | Breast Cancer         | Breast cancer (Oncoarray)                                       | ieu-a-1129               | 2017 | Michailidou K | European             | 106,776     | 61,282 | 45,494    | 10,680,257 |
|                                                            | Lung Cancer           | Lung cancer                                                     | ieu-a-987                | NA   | NA            | European             | 85,449      | 29,863 | 55,586    | 10,439,018 |
|                                                            | Lung Cancer           | Illnesses of siblings: Lung cancer                              | ukb-b-15826              | 2018 | Ben Elsworth  | European             | 361,586     | 8,199  | 353,387   | 9,851,867  |

**Supplementary Table S2** | The information of all SNPs from HPV16 E7 protein dataset

| SNP               | Trait & Source                                                                                                                      | Gene          | Position (hg19) | Function    | R <sup>2</sup> | F-Statistics |
|-------------------|-------------------------------------------------------------------------------------------------------------------------------------|---------------|-----------------|-------------|----------------|--------------|
| rs1334997         | NA                                                                                                                                  | LINC01788     | chr1:71154117   | intergenic  | 0.017          | 17.31        |
| rs548661          | NA                                                                                                                                  | GRIK3         | chr1:37479392   | intron      | 0.019          | 18.74        |
| rs6670046         | NA                                                                                                                                  | RP11-563D10.1 | chr1:194104179  | intergenic  | 0.021          | 20.97        |
| rs2919024         | Cause of death: multisystem degeneration (UKBB); IGP16 (PMID: 23382691); IGP20 (PMID: 23382691); IgG glycosylation (PMID: 23382691) | PLD5          | chr1:242522042  | intron      | 0.018          | 17.70        |
| rs9808377         | Pulse rate (UKBB)                                                                                                                   | TTN           | chr2:179421694  | missense    | 0.022          | 22.86        |
| rs6719607         | Arm fat percentage left (UKBB); Body mass index (UKBB)                                                                              | RN7SL361P     | chr2:60866057   | upstream    | 0.017          | 17.22        |
| rs17047217        | Self-reported liver or hepatocellular cancer (UKBB)                                                                                 | PNPT1         | chr2:55970893   | intergenic  | 0.017          | 16.67        |
| rs9830760         | NA                                                                                                                                  | CACNA2D3      | chr3:54264197   | intron      | 0.020          | 20.46        |
| rs2864426         | NA                                                                                                                                  | SIAH2         | chr3:145529197  | intergenic  | 0.017          | 17.15        |
| rs7447521         | NA                                                                                                                                  | CTD-2197M16.1 | chr5:27610789   | intergenic  | 0.017          | 16.91        |
| rs2503718         | Height (UKBB)                                                                                                                       | RP11-207F8.1  | chr6:81380831   | intergenic  | 0.019          | 19.67        |
| rs985915          | NA                                                                                                                                  | EYS           | chr6:65433784   | intron      | 0.017          | 17.20        |
| rs216259          | NA                                                                                                                                  | FAM65B        | chr6:24931083   | intron      | 0.018          | 18.20        |
| rs682927          | NA                                                                                                                                  | RNA5SP279     | chr9:1358244    | intergenic  | 0.020          | 20.03        |
| rs7850036         | NA                                                                                                                                  | ANKRD19P      | chr9:95589160   | intron      | 0.021          | 21.24        |
| rs10897761        | Cause of death: home (UKBB)                                                                                                         | RP11-170L9.1  | chr11:80884316  | intergenic  | 0.021          | 21.70        |
| rs7339361         | NA                                                                                                                                  | MYO16         | chr13:109504132 | intron      | 0.019          | 19.10        |
| rs28692644        | NA                                                                                                                                  | CAB39L        | chr13:50005050  | intron      | 0.017          | 17.20        |
| rs41284209        | NA                                                                                                                                  | MED4          | chr13:48650492  | 3_prime_UTR | 0.020          | 19.71        |
| rs8016986         | NA                                                                                                                                  | LINC01148     | chr14:87365603  | intergenic  | 0.021          | 21.50        |
| rs4791360         | NA                                                                                                                                  | GSG1L2        | chr17:9713505   | intron      | 0.019          | 18.82        |
| rs1513688         | NA                                                                                                                                  | RP11-244M2.1  | chr18:37304602  | intron      | 0.018          | 17.92        |
| rs17766830        | IgG galactosylation (PMID: 28878392); Overall health rating (UKBB)                                                                  | RNF165        | chr18:44040660  | 3_prime_UTR | 0.018          | 17.94        |
| Average Statistic | F-                                                                                                                                  | -             | -               | -           | -              | 18.97        |

**Supplementary Table S3** | The information of all SNPs from HPV18 E7 protein dataset

| SNP                 | Trait & Source                                                                                                                                                    | Gene         | Position (hg19) | Function   | R <sup>2</sup> | F-Statistics |
|---------------------|-------------------------------------------------------------------------------------------------------------------------------------------------------------------|--------------|-----------------|------------|----------------|--------------|
| rs12743566          | Frequency of tiredness or lethargy in last 2 weeks (UKBB)                                                                                                         | SLC44A5      | chr1:75700632   | intron     | 0.016          | 16.60        |
| rs35449613          | NA                                                                                                                                                                | DPT          | chr1:168714238  | Missense   | 0.018          | 18.03        |
| rs4849449           | NA                                                                                                                                                                | DPP10        | chr2:116955767  | intergenic | 0.019          | 19.54        |
| rs930937            | NA                                                                                                                                                                | DPP3P1       | chr4:58935390   | intergenic | 0.019          | 19.14        |
| rs249011            | Height (UKBB); Qualifications: college or university degree (UKBB); Trunk fat-free mass (UKBB); Trunk predicted mass (UKBB); Treatment with bendrofluazide (UKBB) | FAM151B      | chr5:79809658   | NA         | 0.020          | 19.67        |
| rs257969            | NA                                                                                                                                                                | HSD17B4      | chr5:118837658  | intron     | 0.017          | 17.35        |
| rs4702371           | NA                                                                                                                                                                | NSUN2        | chr5:6621031    | intron     | 0.020          | 20.72        |
| rs4738265           | Weight (UKBB); Waist circumference (UKBB); Leg fat mass left (UKBB); Body mass index (UKBB); Whole body fat mass (UKBB)                                           | KCNB2        | chr8:73443576   | intergenic | 0.020          | 20.62        |
| rs7820513           | NA                                                                                                                                                                | LINC01419    | chr8:84495551   | intergenic | 0.019          | 19.51        |
| rs2393316           | Cause of death: creutzfeldt-jakob disease (UKBB); Treatment with ventolin 100micrograms inhaler (UKBB); Self-reported meningitis (UKBB)                           | RP11-550A9.1 | chr10:59333071  | intergenic | 0.017          | 17.47        |
| rs11235802          | NA                                                                                                                                                                | FAM168A      | chr11:73259543  | intron     | 0.018          | 18.10        |
| rs241993            | NA                                                                                                                                                                | CRACR2A      | chr12:3818665   | intron     | 0.022          | 22.24        |
| rs3901280           | Leg fat percentage left (UKBB); Leg fat mass left (UKBB)                                                                                                          | RP11-483K5.2 | chr16:8510914   | intergenic | 0.017          | 16.71        |
| Average F-Statistic | -                                                                                                                                                                 | -            | -               | -          | -              | 18.90        |

**Supplementary Table S4** | The information of all SNPs from HPV chronic infection dataset

| SNP                 | Trait & Source                                                                                                                | Gene          | Position (hg19) | Function   | R <sup>2</sup> | F-Statistics |
|---------------------|-------------------------------------------------------------------------------------------------------------------------------|---------------|-----------------|------------|----------------|--------------|
| rs34563630          | Leg fat percentage left (UKBB); Leg fat mass left (UKBB)                                                                      | DPP3P1        | chr4:61849734   | intergenic | 0.082          | 16.80        |
| rs1482207           | NA                                                                                                                            | CSMD1         | chr8:3503182    | intron     | 0.080          | 16.43        |
| rs74961872          | Cause of death: other specified place (UKBB)                                                                                  | RP11-546K22.1 | chr8:52968730   | intergenic | 0.081          | 16.74        |
| rs7001081           | Systolic blood pressure (UKBB)                                                                                                | LINC01289     | chr8:64685833   | intron     | 0.091          | 18.96        |
| rs2731038           | NA                                                                                                                            | DBX2          | chr12:45417666  | Missense   | 0.082          | 16.77        |
| rs7176426           | NA                                                                                                                            | SLC12A6       | chr15:34614257  | intron     | 0.083          | 17.04        |
| rs405103            | NA                                                                                                                            | RP11-326A19.4 | chr15:89617230  | intron     | 0.097          | 20.31        |
| rs9924993           | NA                                                                                                                            | U91319.1      | chr16:13639660  | intron     | 0.084          | 17.23        |
| rs4789457           | NA                                                                                                                            | RP11-13K12.2  | chr17:75516811  | intergenic | 0.080          | 16.34        |
| rs59943563          | NA                                                                                                                            | PTPRM         | chr18:8266569   | intron     | 0.080          | 16.40        |
| rs11874458          | Body mass index (PMID: 28892062); Cholelithiasis (UKBB); Self-reported respiratory infection (UKBB); Acute pharyngitis (UKBB) | DCC           | chr18:50572367  | intron     | 0.081          | 16.57        |
| rs1293153           | NA                                                                                                                            | RP13-379L11.3 | chr20:52951047  | intergenic | 0.097          | 20.37        |
| rs6069487           | NA                                                                                                                            | RP13-379L11.3 | chr20:54515066  | intergenic | 0.081          | 16.63        |
| Average F-Statistic | -                                                                                                                             | -             | -               | -          | -              | 17.43        |

**Supplementary Table S5** | The results of reverse MR analysis

| Exposure and methods                         |                           | Outcomes |         |          |         |
|----------------------------------------------|---------------------------|----------|---------|----------|---------|
| Main.exposure                                | Method                    | HPV16 E7 |         | HPV18 E7 |         |
|                                              |                           | nSNP     | P.value | nSNP     | P.value |
| Bladder Cancer<br>(ieu-b-4874)               | MR Egger                  | 10       | 0.414   | 10       | 0.718   |
|                                              | Weighted median           | 10       | 0.345   | 10       | 0.738   |
|                                              | Inverse variance weighted | 10       | 0.320   | 10       | 0.347   |
|                                              | Simple mode               | 10       | 0.563   | 10       | 0.824   |
|                                              | Weighted mode             | 10       | 0.512   | 10       | 0.967   |
| Anal Cancer<br>(finn-b-C3_ANUS_ANALCANAL)    | MR Egger                  | 4        | 0.369   | 4        | 0.940   |
|                                              | Weighted median           | 4        | 0.353   | 4        | 0.667   |
|                                              | Inverse variance weighted | 4        | 0.279   | 4        | 0.668   |
|                                              | Simple mode               | 4        | 0.642   | 4        | 0.832   |
|                                              | Weighted mode             | 4        | 0.436   | 4        | 0.624   |
| Prostate Cancer<br>(ukb-b-18843)             | MR Egger                  | 2        | NA      | 2        | NA      |
|                                              | Weighted median           | 2        | NA      | 2        | NA      |
|                                              | Inverse variance weighted | 2        | NA      | 2        | 0.121   |
|                                              | Simple mode               | 2        | NA      | 2        | NA      |
|                                              | Weighted mode             | 2        | NA      | 2        | NA      |
| Vaginal Cancer<br>(finn-b-CD2_BENIGN_VAGINA) | MR Egger                  | 10       | 0.066   | 10       | 0.426   |
|                                              | Weighted median           | 10       | 0.225   | 10       | 0.384   |
|                                              | Inverse variance weighted | 10       | 0.645   | 10       | 0.843   |
|                                              | Simple mode               | 10       | 0.514   | 10       | 0.354   |
|                                              | Weighted mode             | 10       | 0.204   | 10       | 0.327   |
| Breast Cancer<br>(ukb-b-12227)               | MR Egger                  | 19       | 0.153   | 19       | 0.999   |
|                                              | Weighted median           | 19       | 0.271   | 19       | 0.228   |
|                                              | Inverse variance weighted | 19       | 0.386   | 19       | 0.446   |
|                                              | Simple mode               | 19       | 0.652   | 19       | 0.430   |
|                                              | Weighted mode             | 19       | 0.477   | 19       | 0.306   |
| Colorectal Cancer<br>(finn-b-C3_COLORECTAL)  | MR Egger                  | 15       | 0.170   | 15       | 0.039   |
|                                              | Weighted median           | 15       | 0.764   | 15       | 0.601   |
|                                              | Inverse variance weighted | 15       | 0.937   | 15       | 0.877   |
|                                              | Simple mode               | 15       | 0.646   | 15       | 0.574   |
|                                              | Weighted mode             | 15       | 0.712   | 15       | 0.712   |
| Lung Cancer<br>(ieu-a-985)                   | MR Egger                  | 19       | 0.474   | 19       | 0.525   |
|                                              | Weighted median           | 19       | 0.364   | 19       | 0.853   |
|                                              | Inverse variance weighted | 19       | 0.141   | 19       | 0.830   |
|                                              | Simple mode               | 19       | 0.544   | 19       | 0.443   |
|                                              | Weighted mode             | 19       | 0.524   | 19       | 0.459   |
| Vulvar Cancer<br>(finn-b-CD2_BENIGN_VULVA)   | MR Egger                  | 4        | 0.658   | 4        | 0.658   |
|                                              | Weighted median           | 4        | 0.481   | 4        | 0.481   |
|                                              | Inverse variance weighted | 4        | 0.541   | 4        | 0.541   |
|                                              | Simple mode               | 4        | 0.555   | 4        | 0.555   |
|                                              | Weighted mode             | 4        | 0.412   | 4        | 0.412   |
| Oropharyngeal Cancer<br>(ieu-b-4968)         | MR Egger                  | 5        | 0.864   | 5        | 0.335   |
|                                              | Weighted median           | 5        | 0.746   | 5        | 0.409   |
|                                              | Inverse variance weighted | 5        | 0.231   | 5        | 0.479   |
|                                              | Simple mode               | 5        | 0.875   | 5        | 0.441   |

|                                                      |                           |    |       |    |       |
|------------------------------------------------------|---------------------------|----|-------|----|-------|
| Head and Neck Cancer<br>(ieu-b-4912)                 | Weighted mode             | 5  | 0.867 | 5  | 0.422 |
|                                                      | MR Egger                  | 12 | 0.306 | 12 | 0.151 |
|                                                      | Weighted median           | 12 | 0.934 | 12 | 0.090 |
|                                                      | Inverse variance weighted | 12 | 0.752 | 12 | 0.239 |
| Ovarian Cancer<br>(ieu-b-4963)                       | Simple mode               | 12 | 0.758 | 12 | 0.191 |
|                                                      | Weighted mode             | 12 | 0.731 | 12 | 0.195 |
|                                                      | MR Egger                  | 9  | 0.168 | 9  | 0.634 |
|                                                      | Weighted median           | 9  | 0.347 | 9  | 0.109 |
| Skin Cancer (non-melanoma)<br>(finn-b-C3_OTHER_SKIN) | Inverse variance weighted | 9  | 0.150 | 9  | 0.055 |
|                                                      | Simple mode               | 9  | 0.535 | 9  | 0.182 |
|                                                      | Weighted mode             | 9  | 0.556 | 9  | 0.157 |
|                                                      | MR Egger                  | 18 | 0.260 | 18 | 0.671 |
| Skin Cancer<br>(ukb-b-12339)                         | Weighted median           | 18 | 0.475 | 18 | 0.443 |
|                                                      | Inverse variance weighted | 18 | 0.848 | 18 | 0.981 |
|                                                      | Simple mode               | 18 | 0.870 | 18 | 0.629 |
|                                                      | Weighted mode             | 18 | 0.337 | 18 | 0.336 |
|                                                      | MR Egger                  | 1  | NA    | 1  | NA    |
|                                                      | Weighted median           | 1  | NA    | 1  | NA    |
|                                                      | Inverse variance weighted | 1  | NA    | 1  | NA    |
|                                                      | Simple mode               | 1  | NA    | 1  | NA    |
|                                                      | Weighted mode             | 1  | NA    | 1  | NA    |
